# Supplementary material
Source: PubMed Central journal article supplement (PMC5340220)
Supplement: lic-0006-0113-s01.pdf [file lic-0006-0113-s01.pdf]

**Supplementary Table 1:** Background of the patients of screening cohort

| Background                               | PR group <sup>1</sup><br>(n = 8) | PD group <sup>1</sup><br>(n = 8) | <i>P</i> value <sup>2</sup> |
|------------------------------------------|----------------------------------|----------------------------------|-----------------------------|
| Age (years old)                          | 68.5 (60.75 – 75.5)              | 73 (62.75 – 80.75)               | 0.2473                      |
| Sex: male/female                         | 7 / 1                            | 5 / 3                            | 0.5692                      |
| Virus: HBV/HCV/NBNC                      | 5 / 1 / 2                        | 2 / 2 / 4                        | 0.3189                      |
| Maximum tumor size (cm)                  | 4.7 (3.85 – 6.7)                 | 4.2 (2.4 – 11.7)                 | 1                           |
| Number of tumor: $\leq 5$ / $\geq 6$     | 5 / 3                            | 3 / 5                            | 0.6193                      |
| BCLC: B / C <sup>3</sup>                 | 5 / 3                            | 1 / 7                            | 0.1189                      |
| Extrahepatic metastasis: without / with  | 2 / 6                            | 4 / 4                            | 0.6084                      |
| Vascular invasion:<br>without / with     | 7 / 1                            | 5 / 3                            | 0.5692                      |
| Initial dose of sorafenib: 800mg / 400mg | 6 / 2                            | 6 / 2                            | 1                           |
| AFP before treatment (ng/ml)             | 201 (12 – 1644)                  | 4009.5 (9 – 12345)               | 0.4622                      |
| DCP before treatment (mAU/ml)            | 212 (28.25 – 1785)               | 6533.5 (2173 – 380064)           | <b>0.0157</b>               |
| $\Delta$ AFP <sup>4</sup>                | -0.47 (-0.75 - -0.19)            | 0.55 (-0.03 – 1.19)              | <b>0.0074</b>               |
| $\Delta$ DCP <sup>4</sup>                | 0.13 (-0.38 – 15.6)              | 3.03 (1.45 – 5.64)               | 0.3446                      |

<sup>1</sup>Median value (25th–75th percentiles) for contentious variables and number of the patients for categorical variables are shown.

<sup>2</sup>*P* values by the Wilcoxon rank-sum test for contentious variables and by the Fischer's exact test for categorical variables are shown. The bold represent the *p* value of <0.05.

<sup>3</sup> There is no HCC patient with BCLC stage A.

<sup>4</sup> (Serum level after treatment – serum level before treatment)/ serum level before

treatment. The minus value represents the decrease of tumor marker after the sorafenib treatment.

PR: the group showing partial response at 3 months after the initiation of treatment.

PD: the group showing progressive disease at one month after the initiation of treatment.

**Supplementary Table 2:** Clinical factors and serum miR-181a-5p level for affecting overall survival in patients with BCLC-C HCC.

| variables               | Number of patients | <i>P</i> value <sup>1</sup><br>(univariate) | <i>P</i> value <sup>2</sup><br>(multivariate) | Hazard ratio<br>(95% CI)   |
|-------------------------|--------------------|---------------------------------------------|-----------------------------------------------|----------------------------|
| Age (yeas old)          |                    |                                             |                                               |                            |
| 73 ≥                    | 17                 | 0.1204                                      | -                                             | -                          |
| 74 ≤                    | 13                 |                                             |                                               |                            |
| Sex                     |                    |                                             |                                               |                            |
| male                    | 24                 | 0.1738                                      | -                                             | -                          |
| female                  | 6                  |                                             |                                               |                            |
| Maximum size            |                    |                                             |                                               |                            |
| 3.6 cm ≥                | 13                 | 0.2666                                      | -                                             | -                          |
| 3.7 cm ≤                | 17                 |                                             |                                               |                            |
| Number of tumor         |                    |                                             |                                               |                            |
| 5 ≥                     | 12                 | <b>0.0194</b>                               | 0.1549                                        | 0.491 (0.165-1.30)         |
| 6 ≤                     | 18                 |                                             |                                               | 1                          |
| Extrahepatic metastasis |                    |                                             |                                               |                            |
| presence                | 23                 | 0.9519                                      | -                                             | -                          |
| absence                 | 7                  |                                             |                                               |                            |
| Portal vein thrombosis  |                    |                                             |                                               |                            |
| presence                | 11                 | 0.6412                                      | -                                             | -                          |
| absence                 | 19                 |                                             |                                               |                            |
| Serum miR-181a-5p level |                    |                                             |                                               |                            |
| high                    | 10                 | <b>0.0037</b>                               | <b>0.0194</b>                                 | <b>0.267 (0.070-0.818)</b> |
| low                     | 20                 |                                             |                                               | 1                          |

<sup>1</sup> *P* value by log-rank test.

<sup>2</sup> *P* value by Cox proportional-hazards regression model.

Continuous valuables of age, tumor size and number of tumor were categorized using the median values. Bold denotes  $p < 0.05$ .
